# Supplementary material for: Developing a whole systems action plan promoting Dutch adolescents’ sleep health
Source: Springer Nature journal article supplement (doi:10.1186/s12966-025-01711-0), 2025-03-17

- Legend**
- Mental Wellbeing
  - Sleep Parameters
  - Positive relationship
  - - - Negative relationship
  - 25 t/m 41 (sets of) actions
  - (sub)Action at Event level
  - (sub)Action at Structure level
  - (sub)Action at Goal level
  - (sub)Action at Belief level

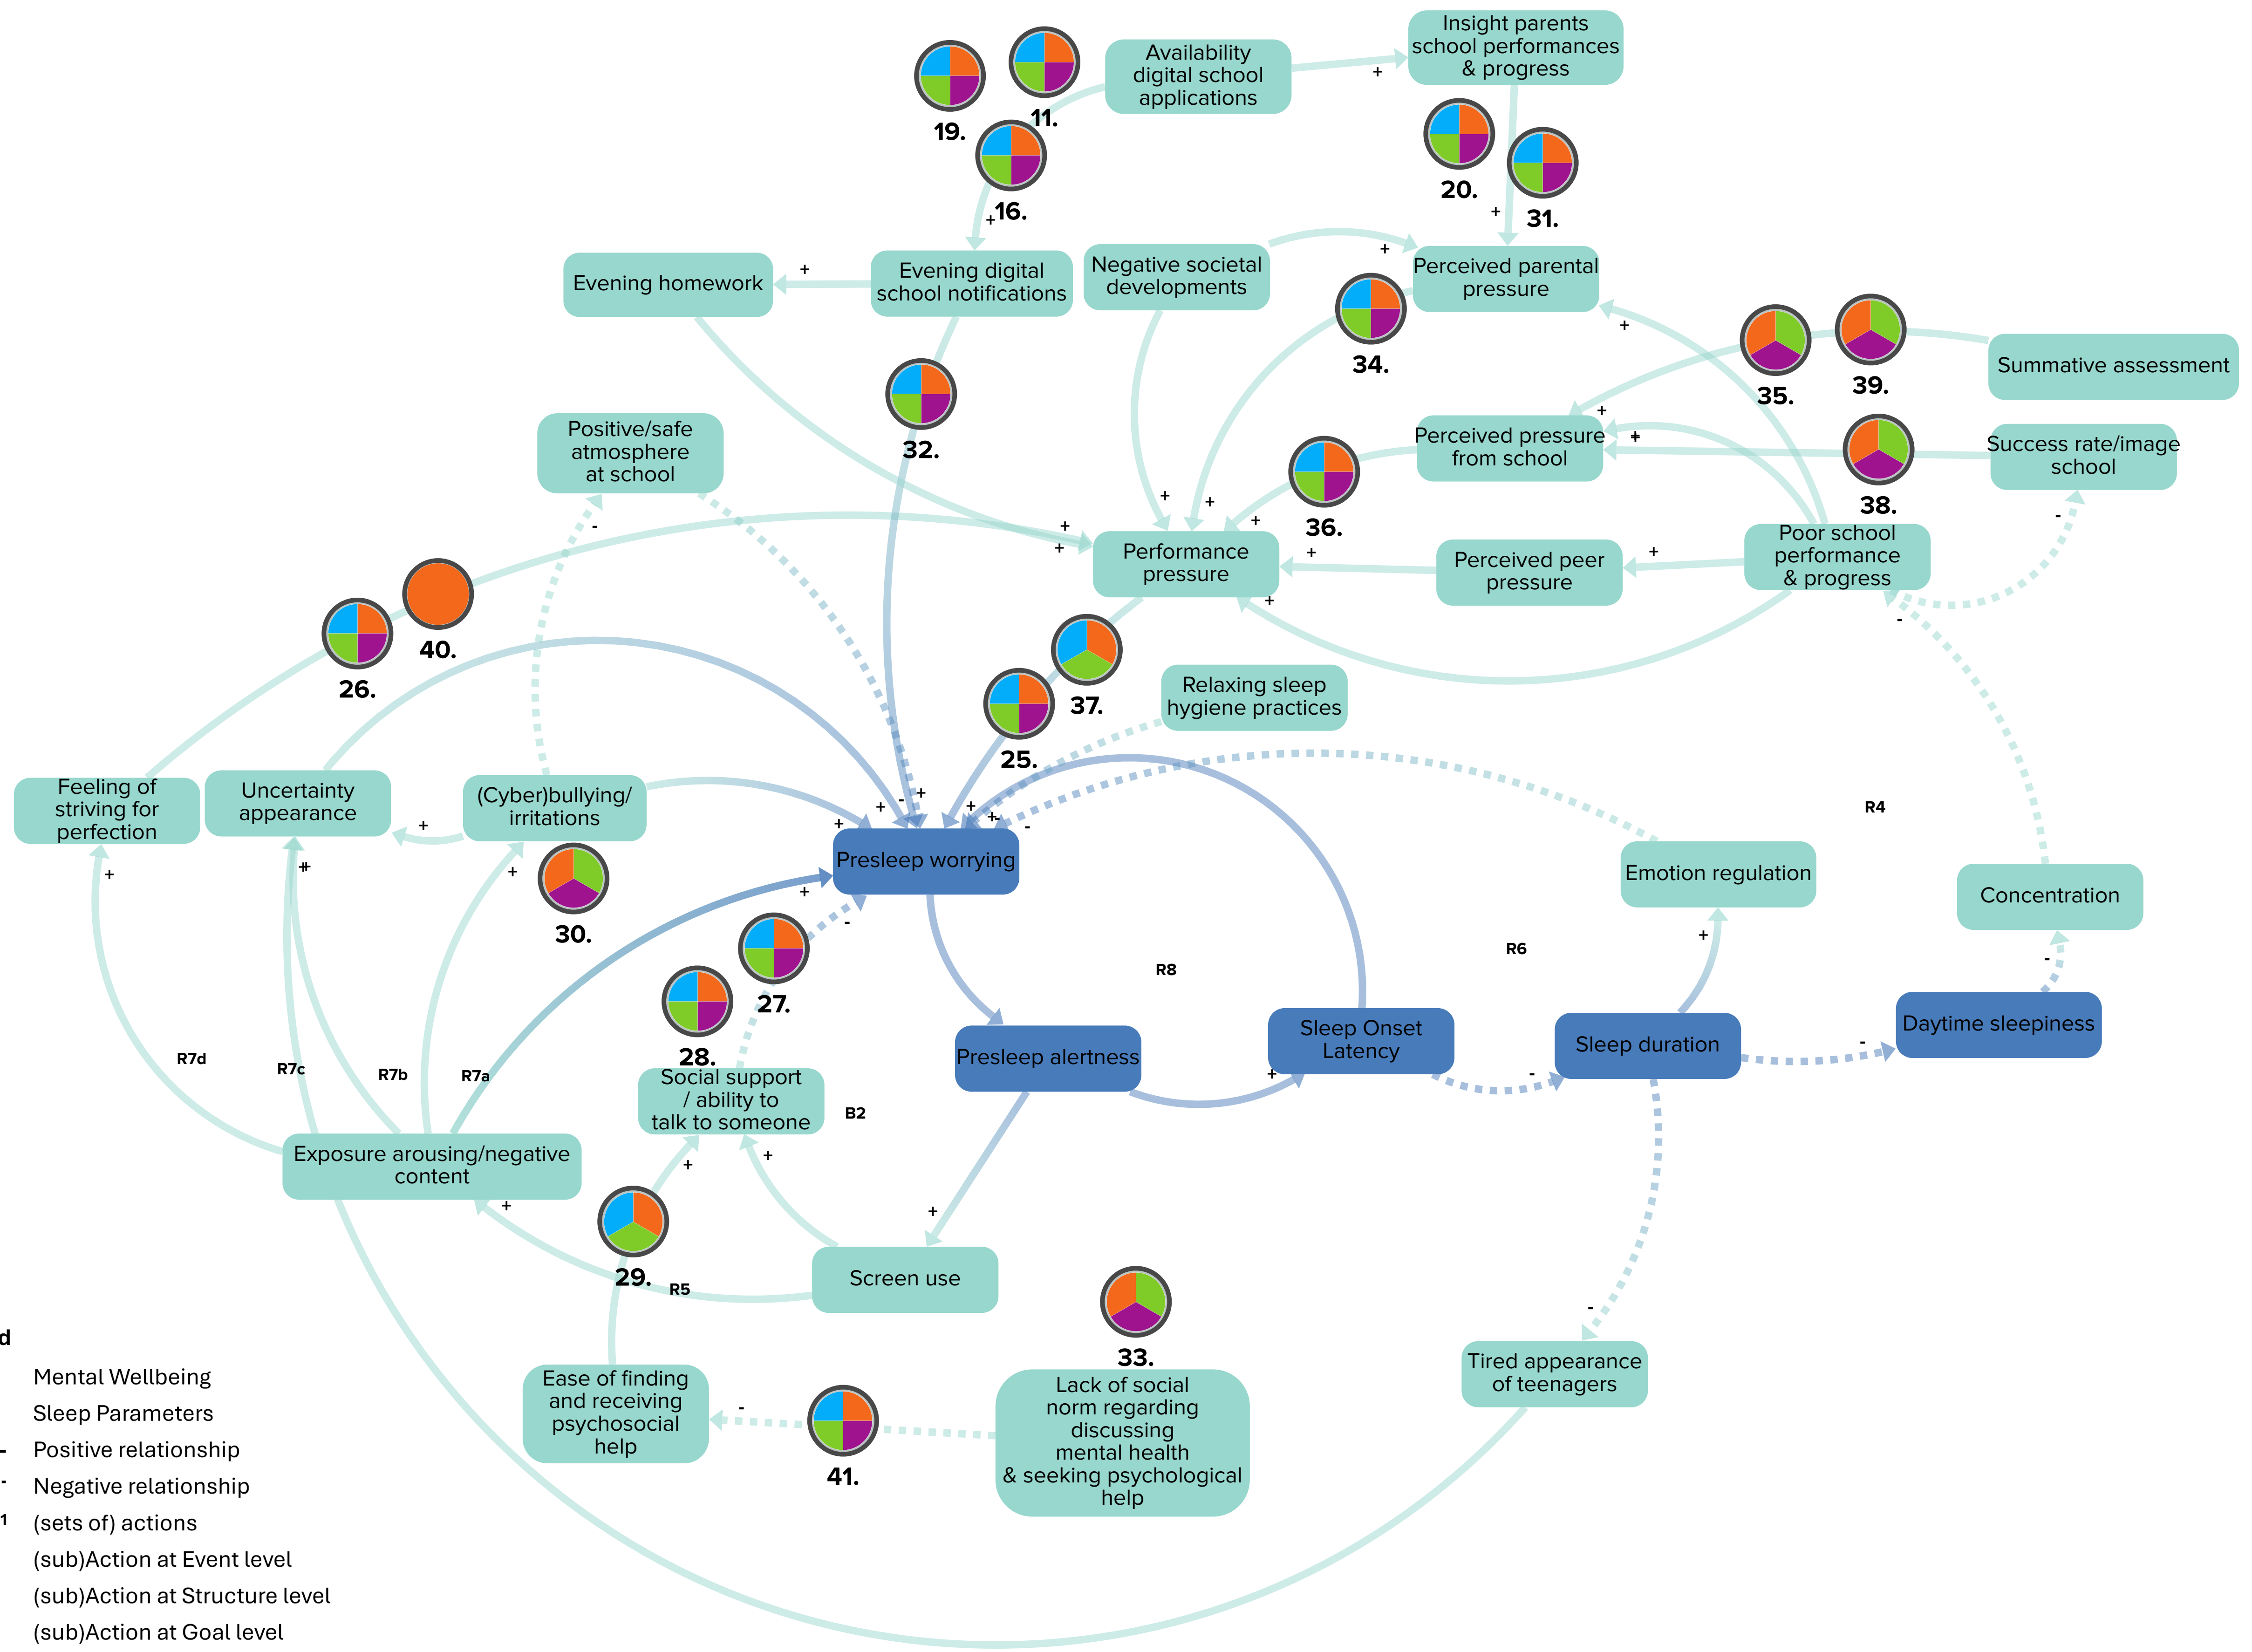

Supplement: MOESM2 [file 12966_2025_1711_MOESM2_ESM.pdf]
